# Supplementary material for: Perovskites and metal nitrides as catalysts in the base-catalysed aldol addition of isobutyraldehyde to formaldehyde
Source: Royal Society of Chemistry journal article supplement (doi:10.1039/c5cy01479d), 2016-01-01
Supplement: c5cy01479d1.pdf [file c5cy01479d1.pdf]

## Electronic supplementary information:

### Perovskites and Metal Nitrides as Catalysts in the Base-Catalysed Aldol Addition of Isobutyraldehyde with Formaldehyde

Henrike Kleineberg<sup>a</sup>, Matthias Eisenacher<sup>b,c</sup>, Horst Lange<sup>b</sup>, Heinz Strutz<sup>b</sup>, Regina Palkovits<sup>a,\*</sup>

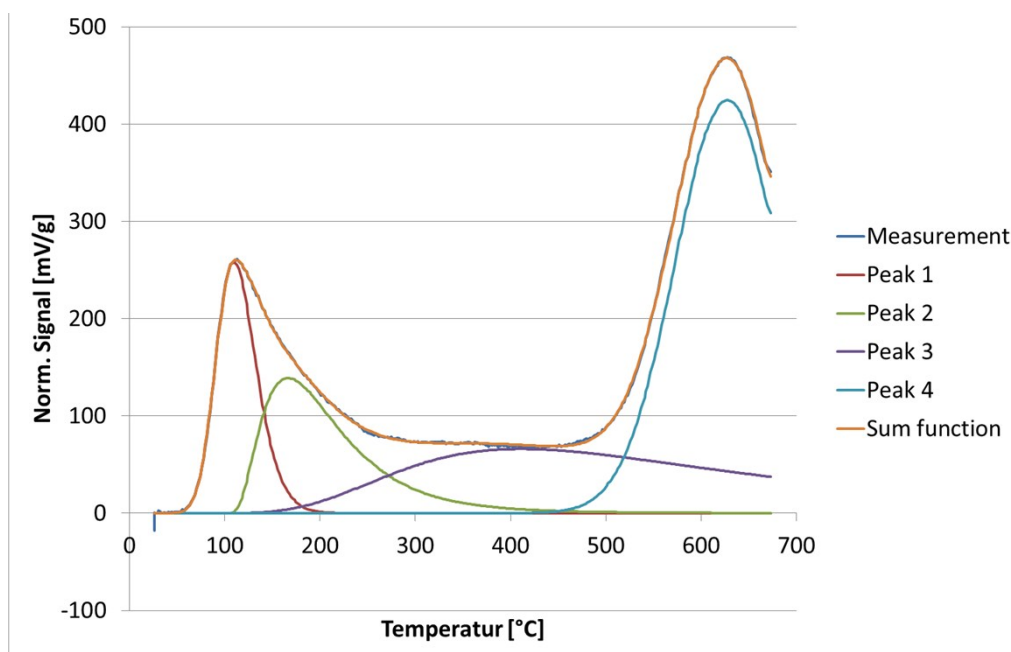

**Figure S1.** TPD-NH<sub>3</sub> and corresponding spectrum deconvolution of regenerated AlN catalyst after the first run (AlN-R1) (Figure 10 (c)).
